# Supplementary material for: Chemical bonding within AIIIBVI materials under uniaxial compression
Source: Royal Society of Chemistry journal article supplement (doi:10.1039/d4cp00937a), 2024-01-01
Supplement: d4cp00937a1.pdf [file d4cp00937a1.pdf]

# Electronic Supplementary Information

## Chemical Bonding within $A^{III}B^{VI}$ Materials under Uniaxial Compression

Roman S. Stepanov,<sup>†</sup> Alexandra D. Radina,<sup>‡</sup> Christian Tantardini,<sup>\*,¶,§,||</sup>

Alexander G. Kvashnin,<sup>⊥</sup> and Alexander V. Kolobov<sup>\*,†,#</sup>

<sup>†</sup>*Research Institute of Physics, Institute of Physics, Herzen State Pedagogical University of  
Russia, 48 Moika emb., St Petersburg, Russia 191186*

<sup>‡</sup>*Skolkovo Institute of Science and Technology, 30 Bolshoi Blv., bld. 1, Moscow, Russia  
121205*

<sup>¶</sup>*Hylleraas center, Department of Chemistry, UiT The Arctic University of Norway, PO  
Box 6050 Langnes, N-9037 Tromsø, Norway.*

<sup>§</sup>*Department of Materials Science and NanoEngineering, Rice University, Houston, Texas  
77005, United States of America.*

<sup>||</sup>*Institute of Solid State Chemistry and Mechanochemistry SB RAS, 630128, Novosibirsk,  
Russia*

<sup>⊥</sup>*Skolkovo Institute of Science and Technology, Skolkovo Innovation Center, Bolshoy  
Boulevard 30, bld. 1, Moscow, 121205, Russia*

<sup>#</sup>*Department of Electronics, Institute of Physics, Herzen University, 48 Moika emb., St.  
Petersburg, Russia 191186*

E-mail: [christiantantardini@gmail.com](mailto:christiantantardini@gmail.com); [akolobov@herzen.spb.ru](mailto:akolobov@herzen.spb.ru)

Table S1: Topological parameters at the BCP for GaTe:  $\delta$ , electron density;  $\gamma$ , Laplacian of electron density;  $\xi$ , Virial energy;  $\zeta$ , Kinetic energy;  $\eta$ , Hamiltonian;  $\lambda$ , Bond degree parameters.

| Pres.<br>/GPa | $\rho_b^\delta$<br>/ ( $e \cdot \text{Bohr}^{-3}$ ) | $\nabla^2 \rho_b^\gamma$<br>/ ( $e \cdot \text{Bohr}^{-5}$ ) | $ V_b ^\xi$<br>/ (a.u.) | $G_b^\zeta$<br>/ (a.u.) | $H_b^\eta$<br>/ (a.u.) | $ V_b /G_b$ | $H_b/\rho_b^\lambda$<br>/ $\frac{(a.u.)}{(e \cdot \text{Bohr}^{-3})}$ |
|---------------|-----------------------------------------------------|--------------------------------------------------------------|-------------------------|-------------------------|------------------------|-------------|-----------------------------------------------------------------------|
| 0             | 6.54E-02                                            | -1.40E-02                                                    | -6.44E-02               | 2.81E-02                | -3.40E-02              | 2.29        | -0.52                                                                 |
|               | 5.69E-02                                            | 1.30E-02                                                     | -4.51E-02               | 2.63E-02                | -2.09E-02              | 1.71        | -                                                                     |
| 8             | 7.24E-02                                            | -2.26E-03                                                    | -7.28E-02               | 3.58E-02                | -3.67E-02              | 2.04        | -0.51                                                                 |
|               | 5.64E-02                                            | 5.81E-03                                                     | -4.62E-02               | 2.48E-02                | -2.24E-02              | 1.86        | -                                                                     |
| 10            | 4.03E-02                                            | 3.06E-02                                                     | -1.95E-02               | 1.87E-02                | -5.92E-03              | 1.04        | -                                                                     |
|               | 4.15E-02                                            | 2.06E-02                                                     | -2.35E-02               | 1.77E-02                | -9.15E-03              | 1.32        | -                                                                     |
|               | 4.09E-02                                            | 2.97E-02                                                     | -2.05E-02               | 1.89E-02                | -6.55E-03              | 1.08        | -                                                                     |
|               | 5.94E-02                                            | -3.58E-04                                                    | -5.19E-02               | 2.59E-02                | -2.60E-02              | 2.01        | -0.44                                                                 |
| 30            | 5.89E-02                                            | -3.59E-03                                                    | -5.21E-02               | 2.50E-02                | -2.65E-02              | 2.08        | -0.45                                                                 |
|               | 7.77E-02                                            | 4.41E-03                                                     | -8.02E-02               | 4.14E-02                | -3.95E-02              | 1.94        | -                                                                     |
|               | 4.59E-02                                            | 2.50E-02                                                     | -2.75E-02               | 2.11E-02                | -1.06E-02              | 1.31        | -                                                                     |
|               | 3.05E-02                                            | 2.27E-02                                                     | -1.14E-02               | 1.23E-02                | -2.87E-03              | 0.93        | -                                                                     |
|               | 3.14E-02                                            | 2.21E-02                                                     | -1.24E-02               | 1.27E-02                | -3.44E-03              | 0.98        | -                                                                     |
|               | 7.91E-02                                            | 1.04E-02                                                     | -8.10E-02               | 4.35E-02                | -3.92E-02              | 1.86        | -                                                                     |
|               | 4.97E-02                                            | 3.72E-02                                                     | -2.93E-02               | 2.55E-02                | -9.98E-03              | 1.15        | -                                                                     |

Table S2: Topological parameters at the BCP for InSe:  $\delta$ , electron density;  $\gamma$ , Laplacian of electron density;  $\xi$ , Virial energy;  $\zeta$ , Kinetic energy;  $\eta$ , Hamiltonian;  $\lambda$ , Bond degree parameters.

| Pres.<br>/GPa | $\rho_b^\delta$<br>/ ( $e \cdot \text{Bohr}^{-3}$ ) | $\nabla^2 \rho_b^\gamma$<br>/ ( $e \cdot \text{Bohr}^{-5}$ ) | $ V_b ^\xi$<br>/ (a.u.) | $G_b^\zeta$<br>/ (a.u.) | $H_b^\eta$<br>/ (a.u.) | $ V_b /G_b$ | $H_b/\rho_b^\lambda$<br>/ $\frac{(a.u.)}{(e \cdot \text{Bohr}^{-3})}$ |
|---------------|-----------------------------------------------------|--------------------------------------------------------------|-------------------------|-------------------------|------------------------|-------------|-----------------------------------------------------------------------|
| 0             | 4.90E-02                                            | 1.34E-02                                                     | -3.43E-02               | 2.11E-02                | -1.55E-02              | 1.63        | -                                                                     |
|               | 5.82E-02                                            | 8.57E-02                                                     | -2.87E-02               | 3.93E-02                | -3.65E-03              | 0.73        | -                                                                     |
| 4             | 5.25E-02                                            | 2.00E-02                                                     | -3.73E-02               | 2.45E-02                | -1.61E-02              | 1.52        | -                                                                     |
|               | 5.80E-02                                            | 8.79E-02                                                     | -2.80E-02               | 3.96E-02                | -3.00E-03              | 0.71        | -                                                                     |
| 6             | 5.20E-02                                            | 1.93E-02                                                     | -3.67E-02               | 2.40E-02                | -1.60E-02              | 1.53        | -                                                                     |
|               | 4.15E-02                                            | 6.21E-02                                                     | -1.30E-02               | 2.46E-02                | 1.24E-03               | 0.53        | -                                                                     |
|               | 3.90E-02                                            | 5.66E-02                                                     | -1.16E-02               | 2.23E-02                | 1.27E-03               | 0.52        | -                                                                     |
|               | 6.51E-02                                            | 8.77E-02                                                     | -3.85E-02               | 4.48E-02                | -8.29E-03              | 0.86        | -                                                                     |
| 30            | 2.60E-02                                            | 4.45E-02                                                     | -2.00E-03               | 1.40E-02                | 4.56E-03               | 0.14        | -                                                                     |
|               | 6.64E-02                                            | 5.67E-02                                                     | -4.84E-02               | 4.08E-02                | -1.71E-02              | 1.19        | -                                                                     |
|               | 2.97E-02                                            | 4.44E-02                                                     | -5.30E-03               | 1.56E-02                | 2.90E-03               | 0.34        | -                                                                     |
|               | 2.66E-02                                            | 3.79E-02                                                     | -4.12E-03               | 1.31E-02                | 2.68E-03               | 0.31        | -                                                                     |
|               | 3.13E-02                                            | 5.13E-02                                                     | -4.97E-03               | 1.75E-02                | 3.93E-03               | 0.28        | -                                                                     |
|               | 3.22E-02                                            | 5.15E-02                                                     | -5.79E-03               | 1.79E-02                | 3.54E-03               | 0.32        | -                                                                     |
|               | 8.45E-02                                            | 7.64E-02                                                     | -7.44E-02               | 5.95E-02                | -2.76E-02              | 1.25        | -                                                                     |
| 5.22E-02      | 6.76E-02                                            | -2.50E-02                                                    | 3.22E-02                | -4.03E-03               | 0.77                   | -           |                                                                       |

Table S3: Topological parameters at the BCP for GaSe:  $\delta$ , electron density;  $\gamma$ , Laplacian of electron density;  $\xi$ , Virial energy;  $\zeta$ , Kinetic energy;  $\eta$ , Hamiltonian;  $\lambda$ , Bond degree parameters.

| Pres.<br>/GPa | $\rho_b^\delta$<br>/ ( $e \cdot \text{Bohr}^{-3}$ ) | $\nabla^2 \rho_b^\gamma$<br>/ ( $e \cdot \text{Bohr}^{-5}$ ) | $ V_b ^\xi$<br>/ ( $a.u.$ ) | $G_b^\zeta$<br>/ ( $a.u.$ ) | $H_b^\eta$<br>/ ( $a.u.$ ) | $ V_b /G_b$ | $H_b/\rho_b^\lambda$<br>/ $\frac{(a.u.)}{(e \cdot \text{Bohr}^{-3})}$ |
|---------------|-----------------------------------------------------|--------------------------------------------------------------|-----------------------------|-----------------------------|----------------------------|-------------|-----------------------------------------------------------------------|
| 0             | 6.65E-02                                            | -1.37E-02                                                    | -6.61E-02                   | 2.90E-02                    | -3.47E-02                  | 2.27        | -0.52                                                                 |
|               | 6.92E-02                                            | 4.29E-02                                                     | -5.63E-02                   | 4.06E-02                    | -2.28E-02                  | 1.38        | -                                                                     |
| 11            | 7.58E-02                                            | -1.27E-02                                                    | -8.12E-02                   | 3.69E-02                    | -4.22E-02                  | 2.20        | -0.56                                                                 |
|               | 6.84E-02                                            | 4.23E-03                                                     | -6.46E-02                   | 3.35E-02                    | -3.18E-02                  | 1.93        | -                                                                     |
| 14            | 4.36E-02                                            | 5.59E-02                                                     | -1.70E-02                   | 2.48E-02                    | -1.51E-03                  | 0.69        | -                                                                     |
|               | 8.05E-02                                            | 4.61E-02                                                     | -7.47E-02                   | 5.08E-02                    | -3.16E-02                  | 1.47        | -                                                                     |
|               | 5.21E-02                                            | 4.91E-02                                                     | -2.94E-02                   | 2.90E-02                    | -8.58E-03                  | 1.01        | -                                                                     |
|               | 4.30E-02                                            | 4.78E-02                                                     | -1.83E-02                   | 2.31E-02                    | -3.18E-03                  | 0.79        | -                                                                     |
|               | 4.35E-02                                            | 4.74E-02                                                     | -1.90E-02                   | 2.33E-02                    | -3.58E-03                  | 0.81        | -                                                                     |
|               | 6.73E-02                                            | -6.04E-03                                                    | -6.55E-02                   | 3.10E-02                    | -3.35E-02                  | 2.11        | -0.50                                                                 |
|               | 4.53E-02                                            | 6.97E-02                                                     | -1.56E-02                   | 2.81E-02                    | 9.19E-04                   | 0.55        | -                                                                     |
| 30            | 4.62E-02                                            | 4.28E-02                                                     | -2.35E-02                   | 2.42E-02                    | -6.38E-03                  | 0.97        | -                                                                     |
|               | 6.08E-02                                            | 4.42E-02                                                     | -4.29E-02                   | 3.44E-02                    | -1.59E-02                  | 1.25        | -                                                                     |
|               | 9.35E-02                                            | 5.68E-02                                                     | -9.65E-02                   | 6.48E-02                    | -4.11E-02                  | 1.49        | -                                                                     |
|               | 8.08E-02                                            | 1.43E-03                                                     | -8.64E-02                   | 4.36E-02                    | -4.30E-02                  | 1.98        | -                                                                     |
|               |                                                     |                                                              |                             |                             |                            |             |                                                                       |

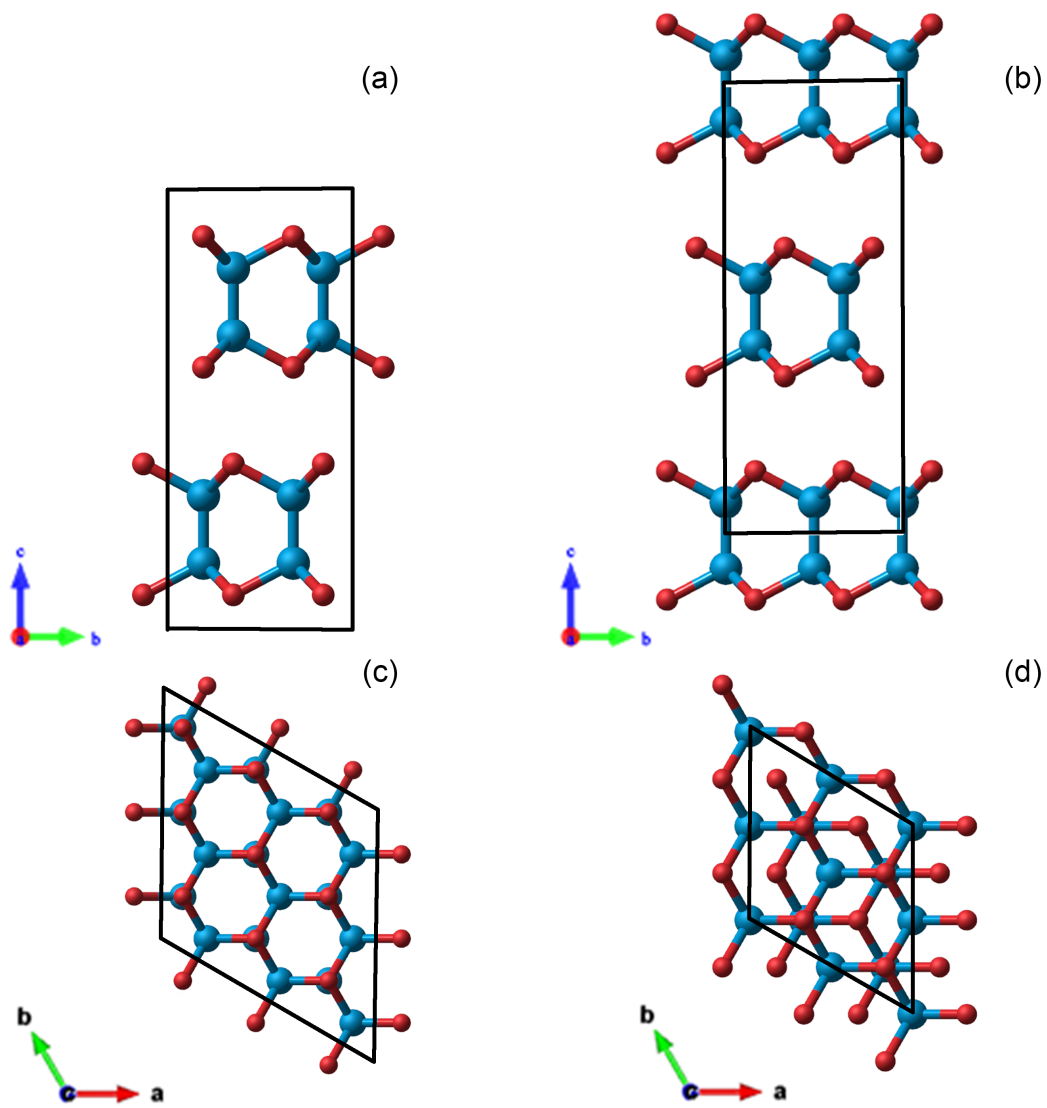

Figure S1: The polymorphs of GaSe: (a)  $\beta$ -phase side view; (b)  $\epsilon$ -phase side view; (c-d) top view respectively

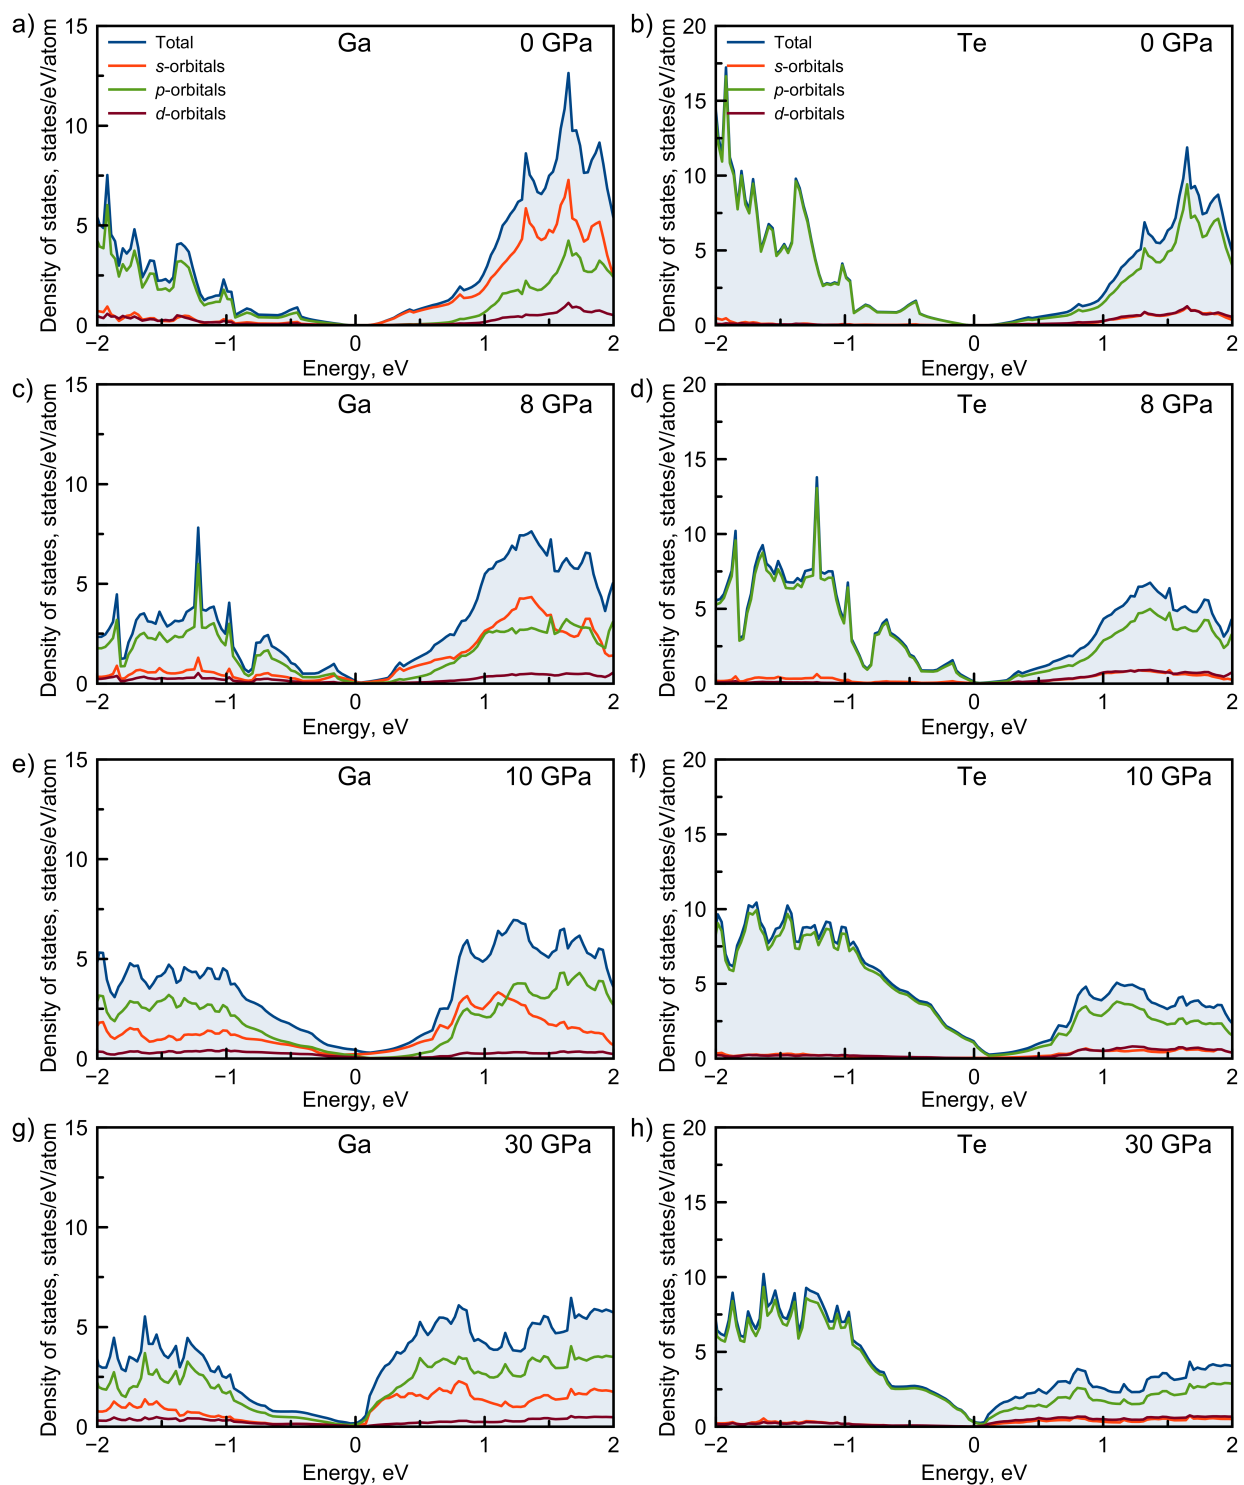

Figure S2: Density of electronic states projected to each atomic orbital of Ga and Te atoms GaTe under pressure: (a)-(b) 0 GPa; (c)-(d) 8 GPa; (e)-(f) 10 GPa; (g)-(h) 30 GPa

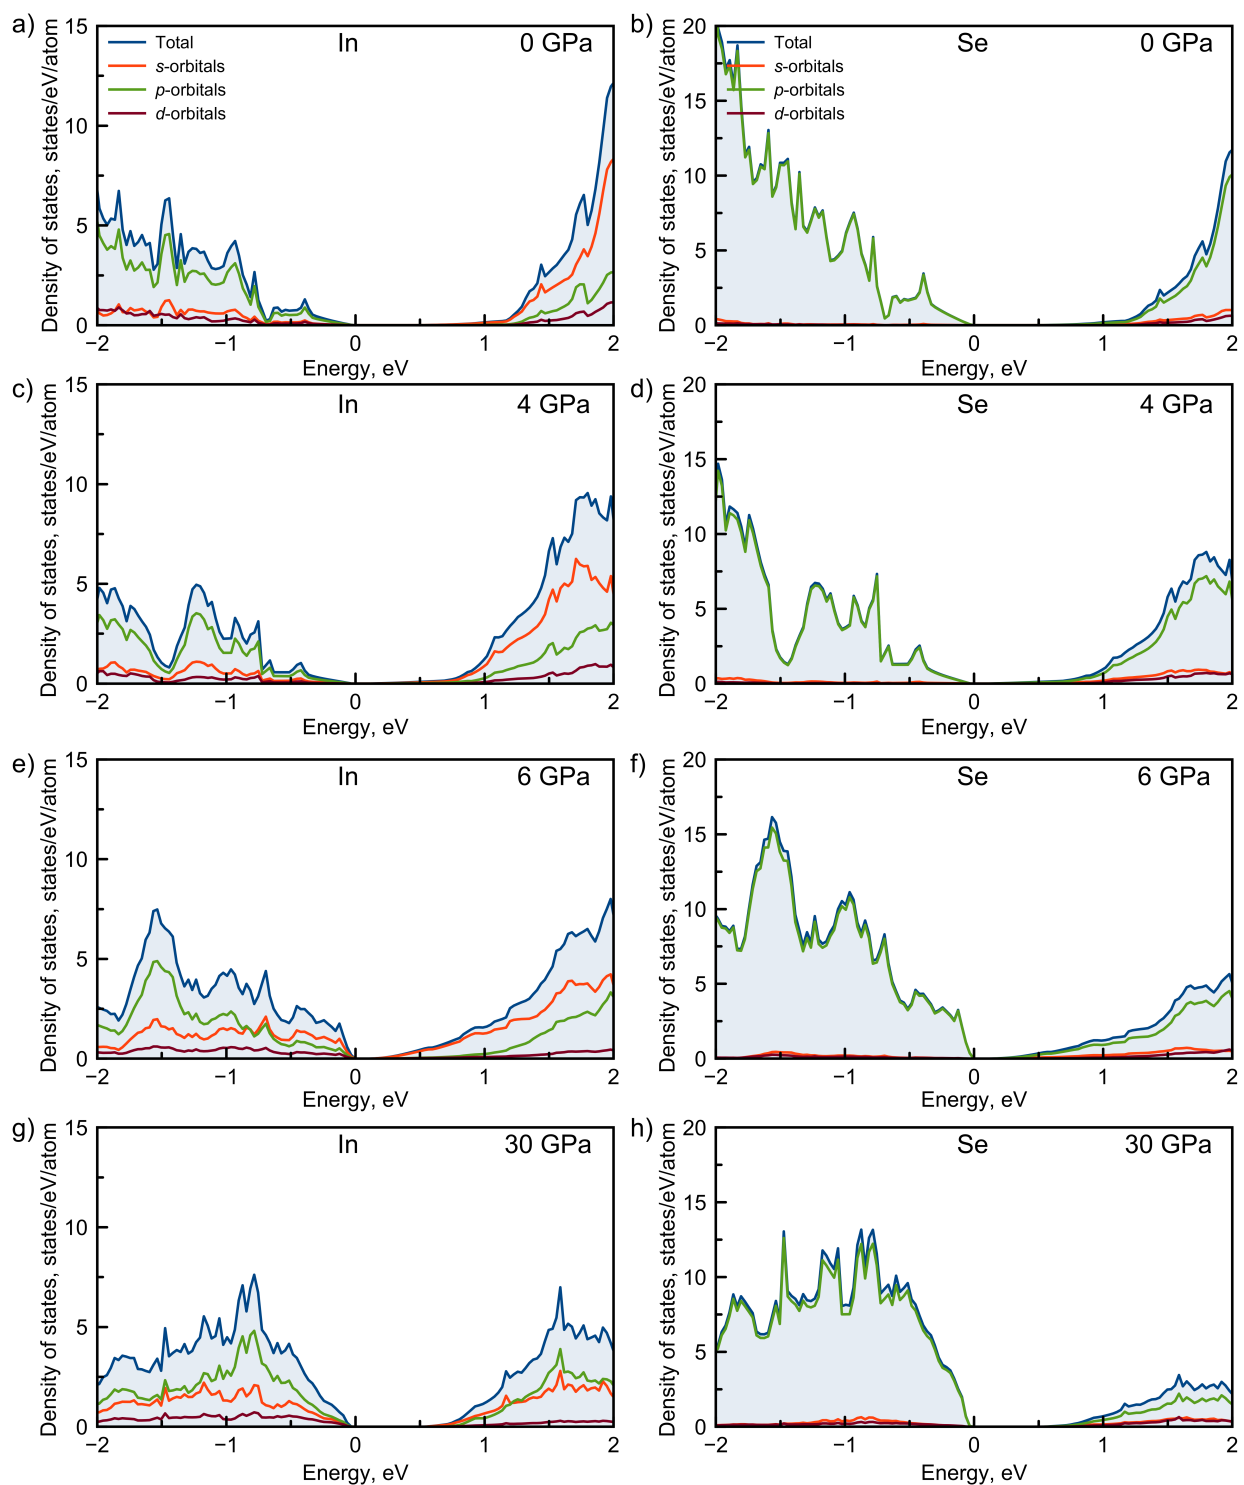

Figure S3: Density of electronic states projected to each atomic orbital of In and Se atoms in InSe under pressure: (a)-(b) 0 GPa; (c)-(d) 4 GPa; (e)-(f) 6 GPa; (g)-(h) 30 GPa

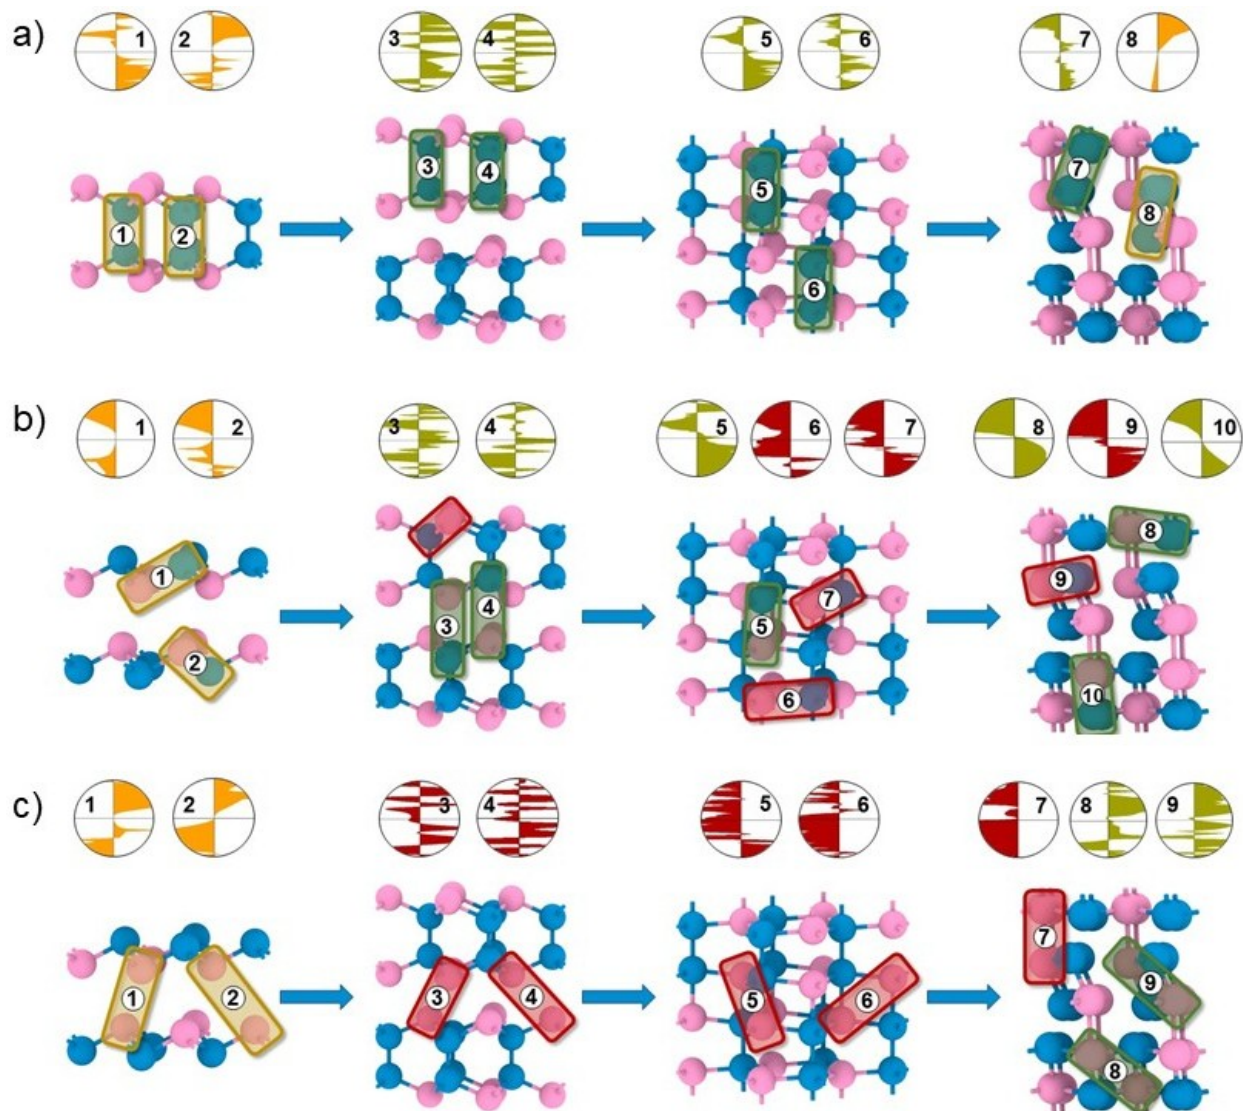

Figure S4: The changes in (a) Ga-Ga; (b) Ga-Te; (c) Te-Te bonds under pressure (Te – orange circle, Ga – blue circle). The bonding, antibonding, and neutral states between the atoms are marked by the green, red and yellow color of the background, respectively. The small circles above the structures represent the pCOHP near the Fermi level. The assigned numbers correspond to the bonds labelled on the structures.

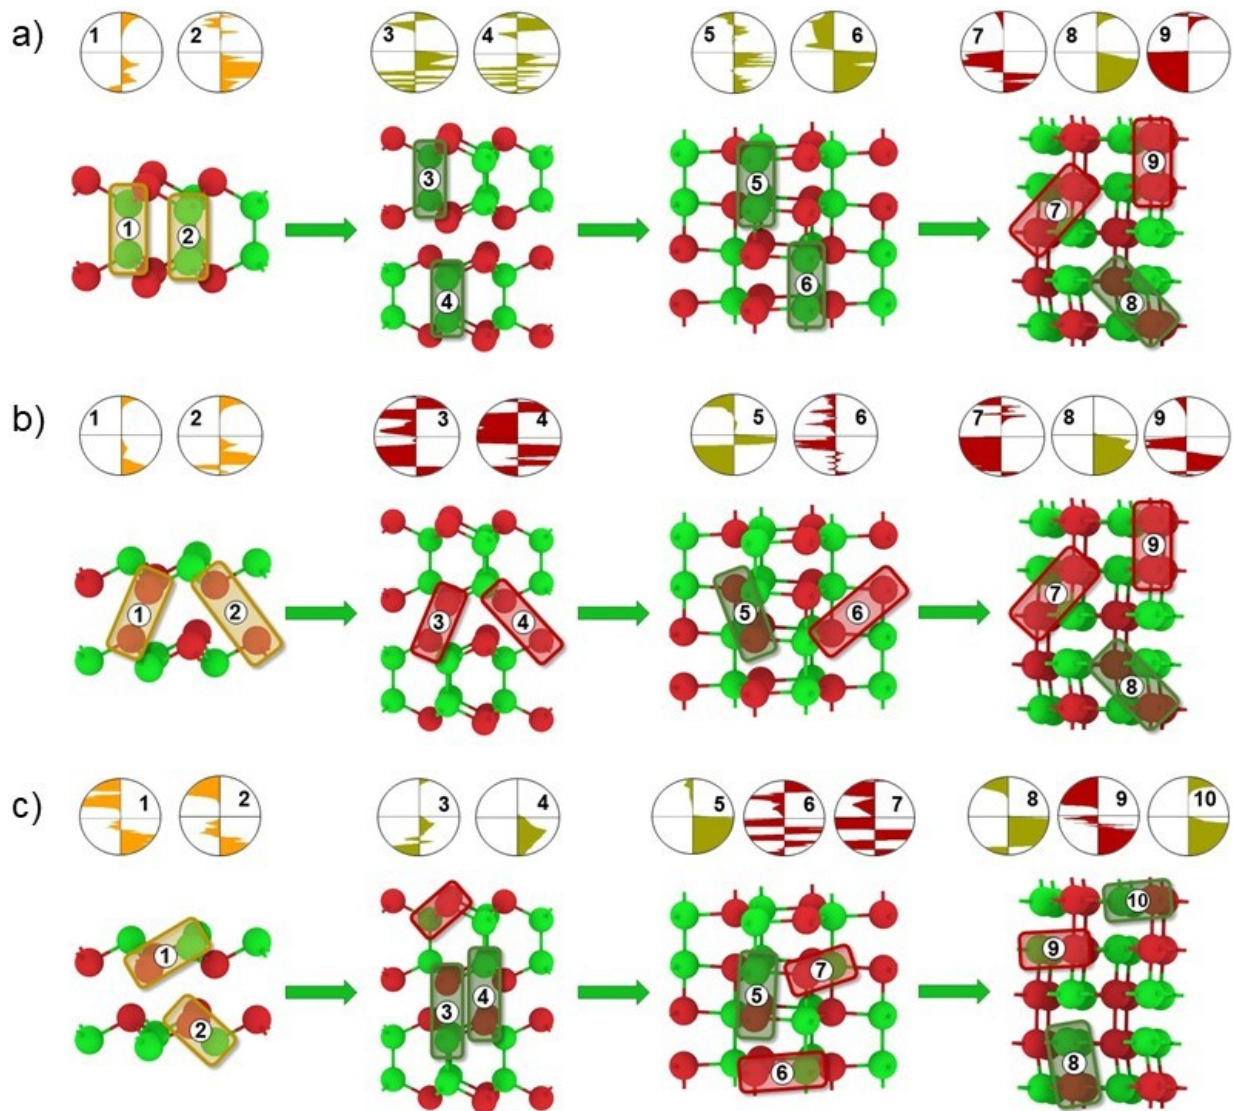

Figure S5: The changes in (a) In-In; (b) Se-Se; (c) In-Se bonds under pressure (Se – red circle, In – green circle). The bonding, antibonding, and neutral states between the atoms are marked by the green, red and yellow color of the background, respectively. The small circles above the structures represent the pCOHP near the Fermi level. The assigned numbers correspond to the bonds labelled on the structures.



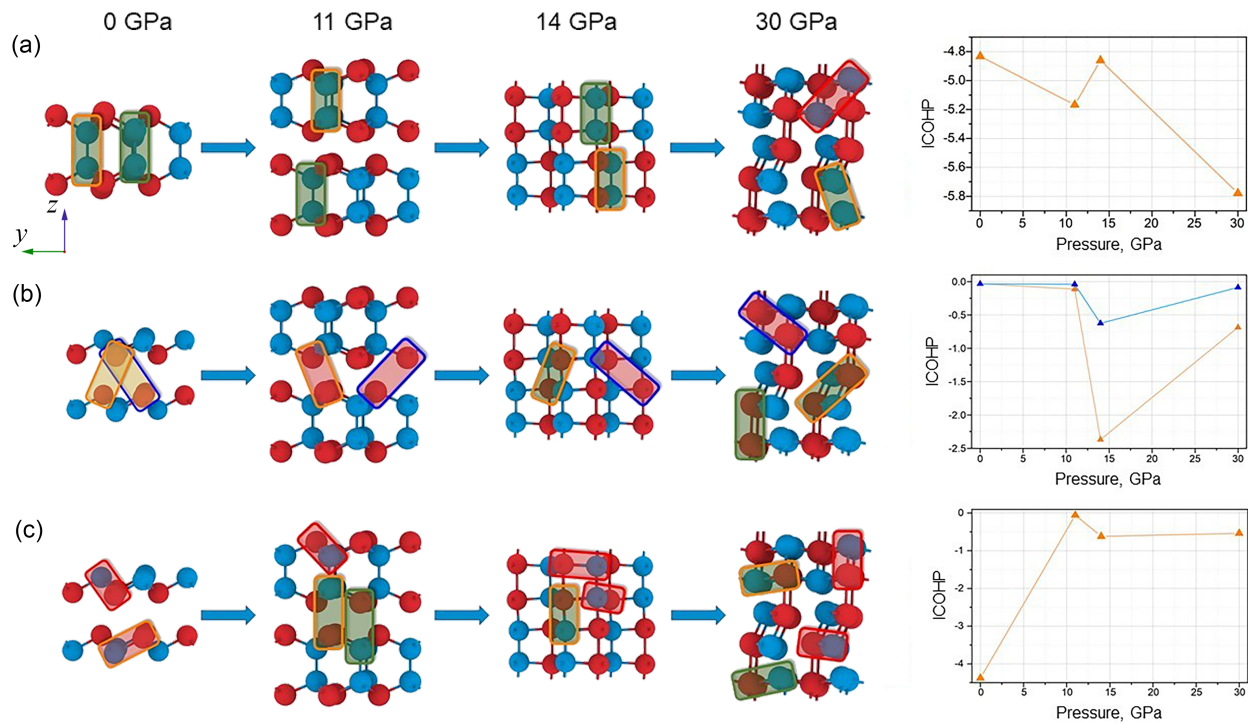

Figure S6: The changings in (a) Ga-Ga; (b) Se-Se; (c) Ga-Se bonds under the pressure (Se – red circle, Ga – blue circle). The bonding, antibonding, and neutral states between the atoms are marked with green, red and yellow color of the background, respectively. The bonds on the ICOHP diagram have the color of the dependence, the other bonds are similar to the marked ones. Different colors in ICOHP dependence of the Se-Se atoms indicate two different bonds that form the vdW gaps.
